# Supplementary material for: Comparison of bacterial profiles in human milk from mothers of term and preterm infants
Source: Research Square preprint supplement (doi:10.21203/rs.3.rs-2449355/v1), 2023-01-10
Supplement: Supplementary file 1 [file 1abce977211557e1d7e73ddf.xlsx]

## Sheet: Table3
	Table 3 Type of bacteria and contamination rate in donor human milk samples
	Bacteria	Term (n = 75)			Preterm (n = 139)			p-value
正期産で有意差あり		n	Prevalence (%)		n	Prevalence (%)
	Staphylococcus epidermidis	59	0.786667		122	0.877698		0.079
	Staphylococcus lugdunensis	13	0.173333		47	0.338129		0.01*
	Staphylococcus aureus	18	0.24		31	0.223022		0.78
	Pseudomonas fluorescens	11	0.146667		39	0.280576		0.027*
	Acinetobacter baumannii	1	0.0133333		4	0.028777		0.66
	Enterococcus faecalis	-	-		31	0.223022		<0.001***
	Enterobacter aerogenes	-	-		23	0.165468		<0.001***
	Stenotrophomonas maltophilia	3	0.04		25	0.179856		0.003**
	Pseudomonas sp.	3	0.04		3	0.0215827		0.43
〇	Pseudomonas putida	6	0.08		1	0.00719424		0.008**
	Pseudomonas aeruginosa	2	0.0266667		-	-		0.12
〇	Serratia liquefaciens	7	0.0933333		-	-		<0.001***
	Serratia sp.	-	-		2	0.0143885		0.77
〇	Pantoea agglomerans	4	0.0533333		-	-		0.014*
	Raoultella ornithinolytica	1	0.0133333		2	0.0143885		1
	Acinetobacter johnsonii	3	0.04		1	0.00719424		0.13
	Acinetobacter sp.	1	0.0133333		1	0.00719424		1
	Acinetobacter ursingii	3	0.04		5	0.0359712		1
	Streptococcus agalactiae	-	-		2	0.0143885		0.77
	Escherichia coli	1	0.0133333		-	-		0.35
	α-streptococcus	2	0.0266667		1	0.00719424		0.28
	Klebsiella oxytoca	9	0.12		15	0.107914		0.79
	Klebsiella pneumoniae	-	-		1	0.00719424		1
	Enterobacter sp.	3	0.04		1	0.00719424		0.13
	Bacillus cereus	3	0.04		-	-		0.042*
	Bacillus subtilis	1	0.0133333		-	-		0.35
	Rhizobium radiobacter	-	-		1	0.00719424		1
	Staphylococcus warneri	1	0.0133333		1	0.00719424		1
	Staphylococcus haemolyticus	1	0.0133333		-	-		0.35
	The bacterial contamination rate refers to the number of batches of certain bacteria that were detected out of the total batches in the HM.
	In some batches, two or more bacteria were detected.
	*: <0.05, **: <0.01. ***: <0.001
	p-values were shown in the table for Chi-squared test or Fisher's exact test results of contamination rates for human milk batches from term and preterm donors.
