# Supplementary material for: Comparison of bacterial profiles in human milk from mothers of term and preterm infants
Source: Research Square preprint supplement (doi:10.21203/rs.3.rs-2449355/v1), 2023-01-10
Supplement: Supplementary file 2 [file 8797056a090ed15e609ebdc8.xlsx]

## Sheet: Table1
	Table 1 Relevant details of participants
			Term					Preterm					p-value
			n	%	Mean (SD)	Median (range)		n	%	Mean (SD)	Median (range)
	Number of participants		31					16
	Number of times breast milk is donated		75		2.4 (3.1)	1 (1-2.5)		139		8.7 (8.1)	6.5 (2-10.3)		<0.001***
	The number of rejected milk samples		17	22.7				34	24.5				0.77
	Age (years)				32.3 (4.9)	32.5 (28-35)				32.6 (4.7)	32.5 (28.8-36.3)		0.75
	Gestational age (weeks)				38.8 (1.2)	39 (38-40)				27.6 (3.9)	28.5 (23.8-31)		<0.001***
	Birthweight (g)				3,084 (322.3)	3,099 (2,884-3,290)				1,040 (601.4)	867 (571-1,414.8)		<0.001***
	When started to donate milk (weeks)				18.9 (6.8)	17 (13-23)				9.8 (5.2)	9 (6-12)		<0.001***
	*: <0.05, **: <0.01. ***: <0.001
	p-values were shown in the table for Chi-square test and Mann–Whitney U test results.
	The mothers of preterm infants were significantly donating milk more often and tend to donate milk earlier after delivery.
	Significant differences were also found between the groups for mother ages and gestational ages.
